# Supplementary material for: ROMEO: Towards the Design of Robot with Haptic Mediation for Remote Conflict
Source: Atypon-hosted journal article supplement (doi:10.1145/3613905.3650781), 2024-05-02

Obstacle

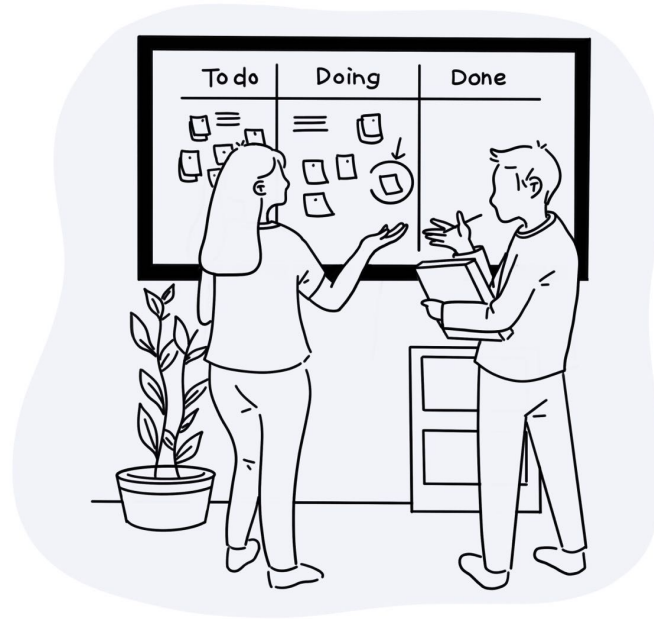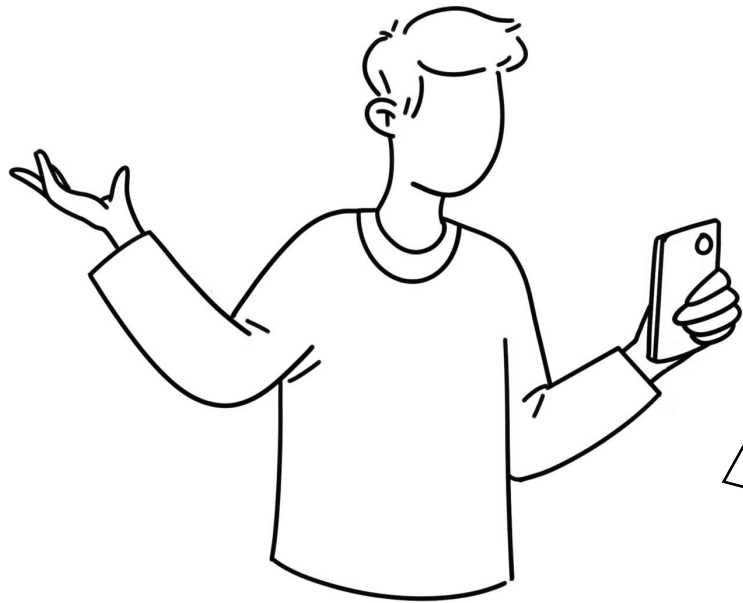

I knew that a temporary withdrawal would affect the progress of this project, but I have to quit anyway.

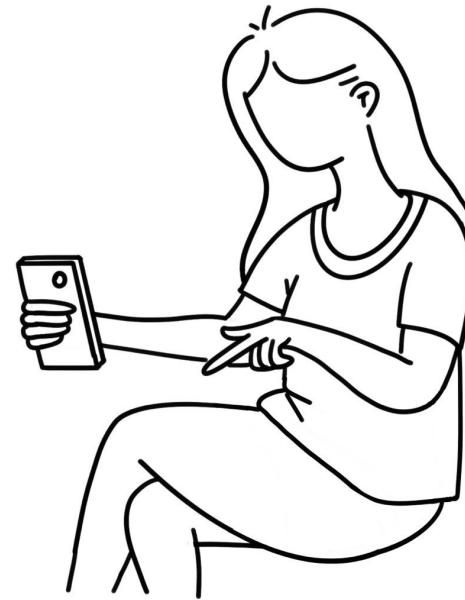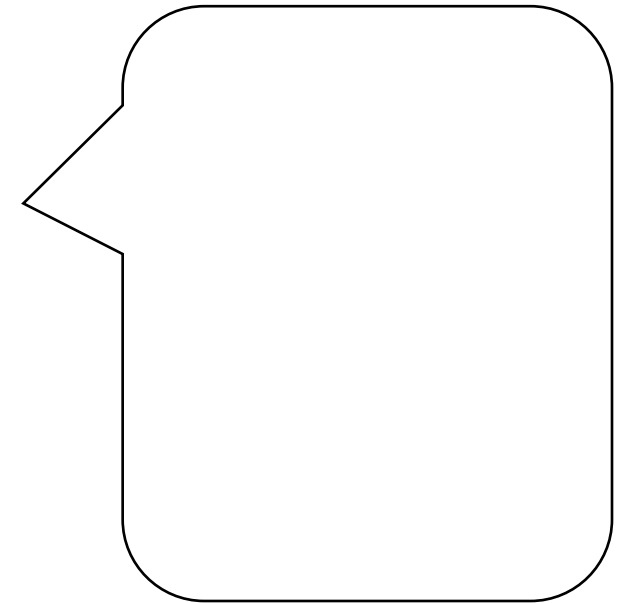

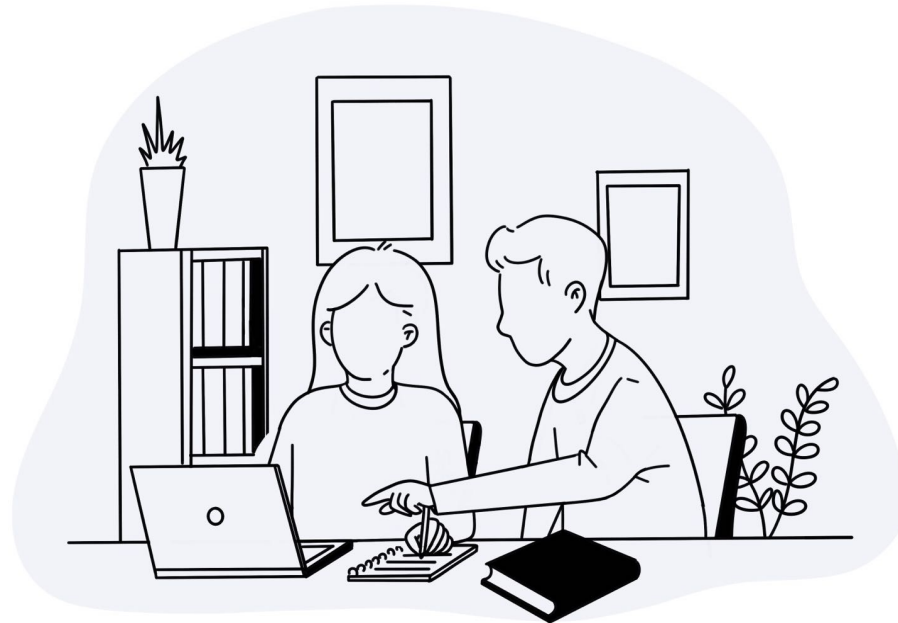

You don't need to insist anymore. I don't agree with your revision opinion.

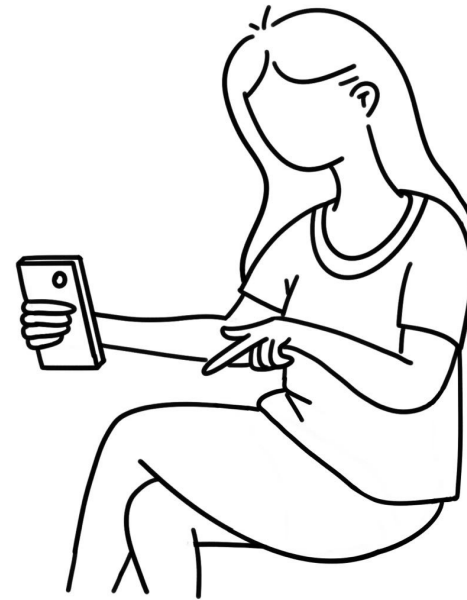

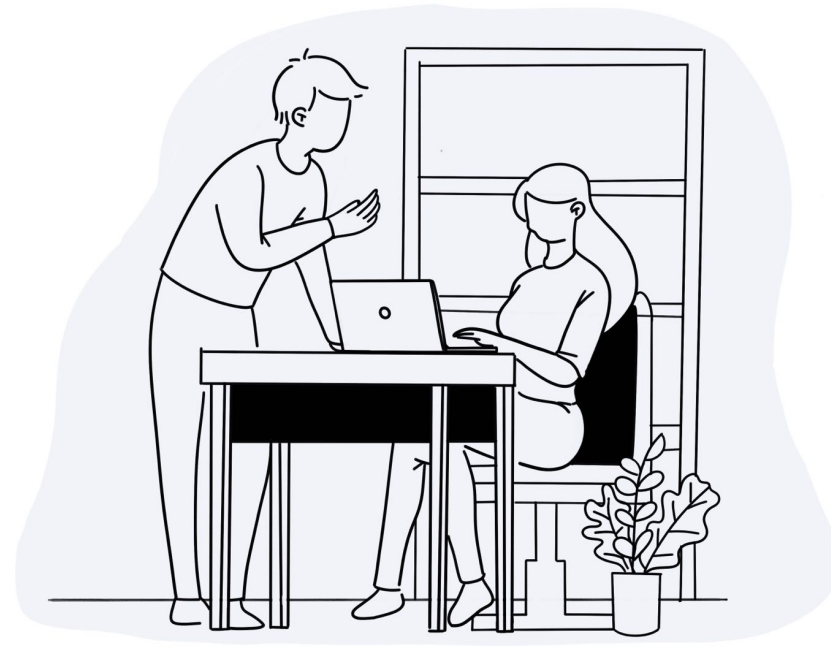

Please tell me  
what is wrong  
with me that  
can make you  
so angry?

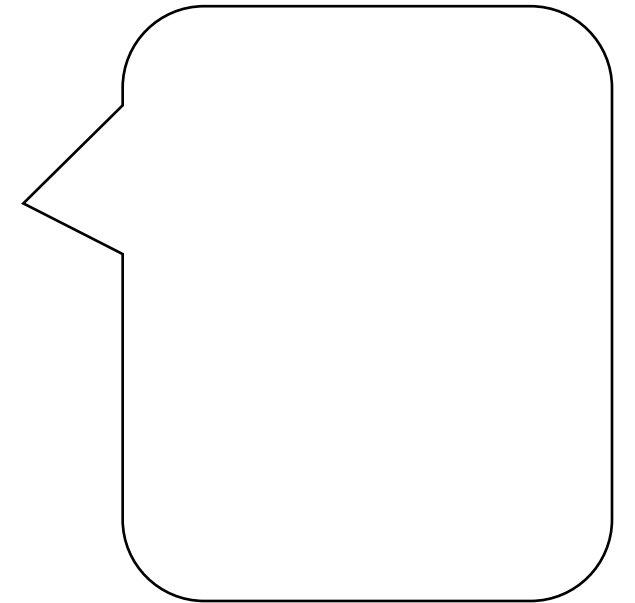

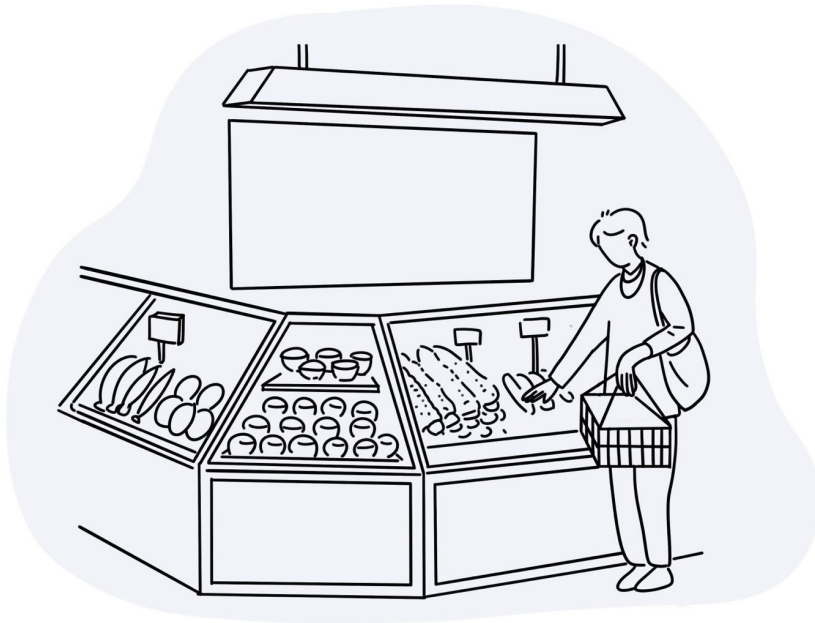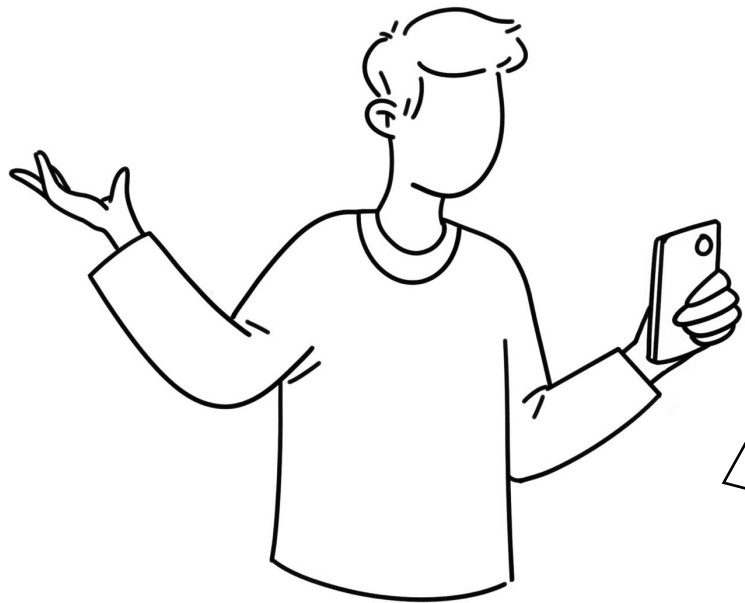

Although it's the store's fault for selling expired food, there's no need to make it so hard for them.

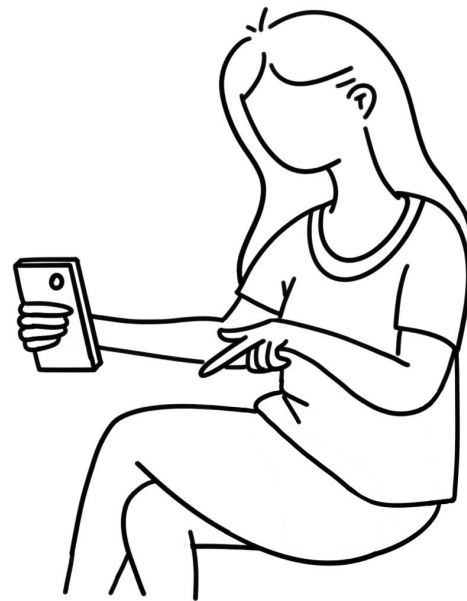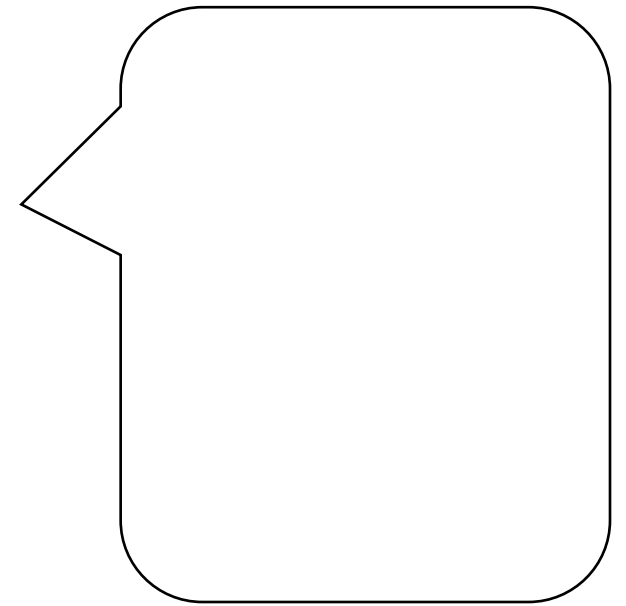

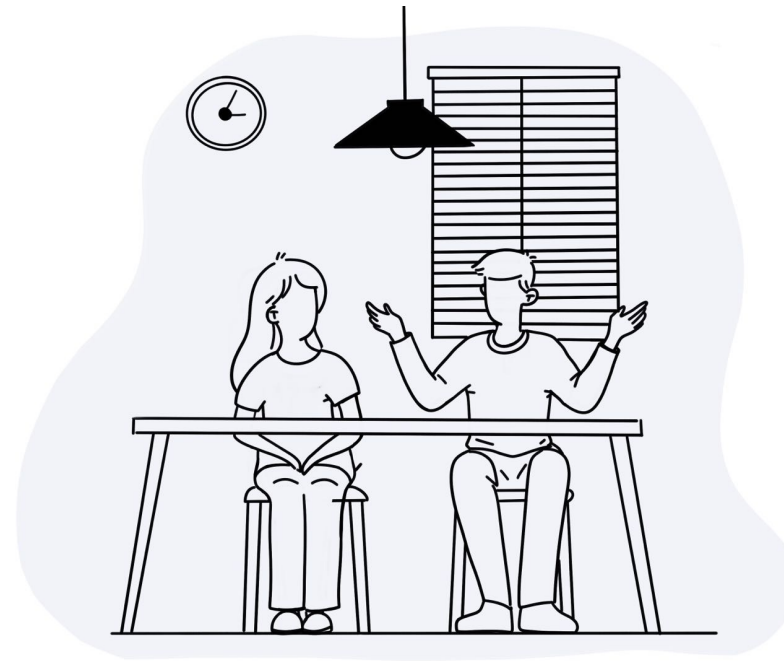

I helped you so much before, this time can you let me do the leader?



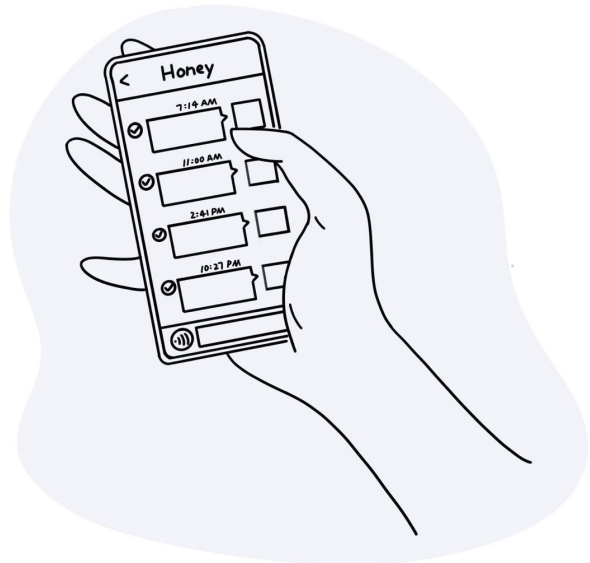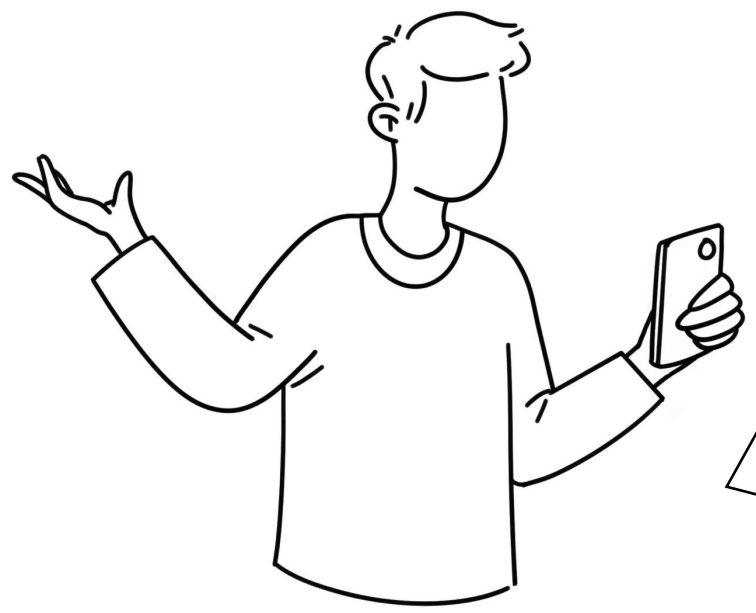

I have a problem, but you can't keep ignoring me and not return a single message.

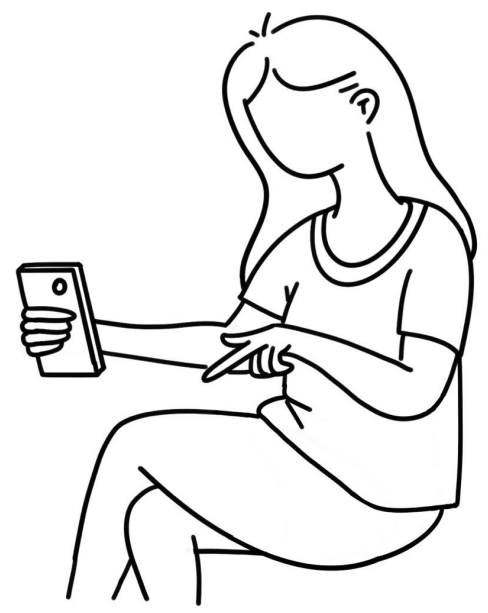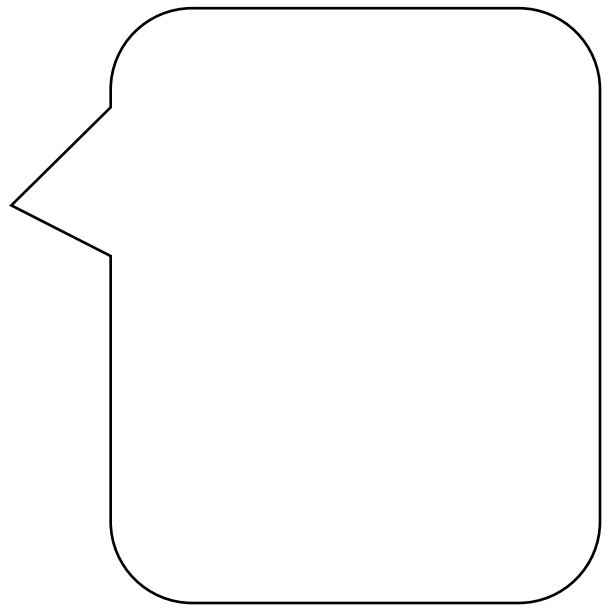

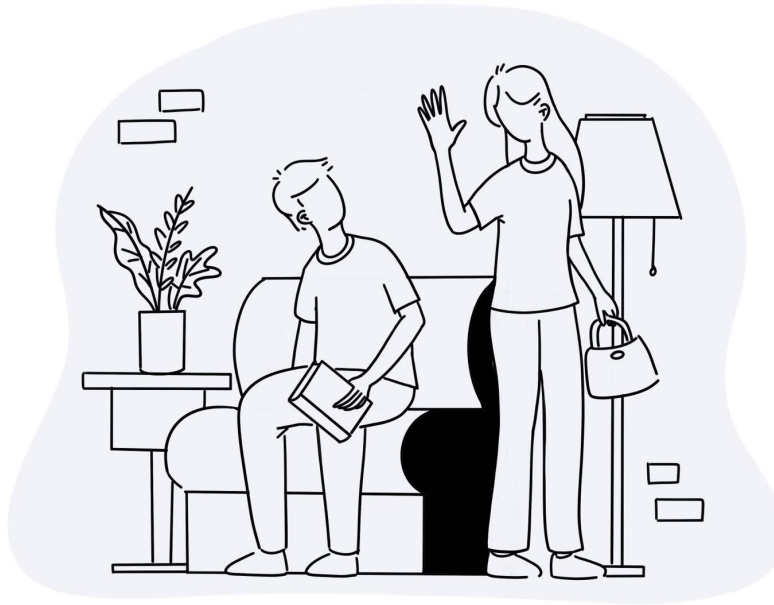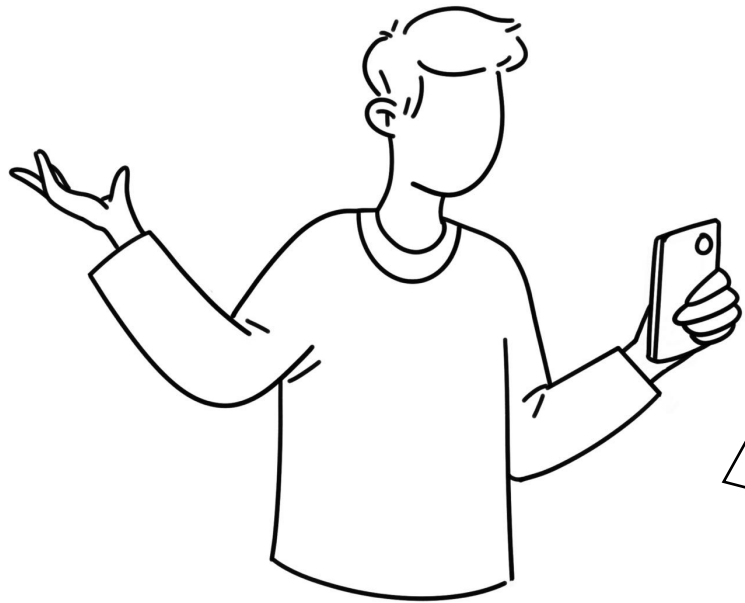

I understand you want to remind me, but it's really annoying that you keep talking about it.

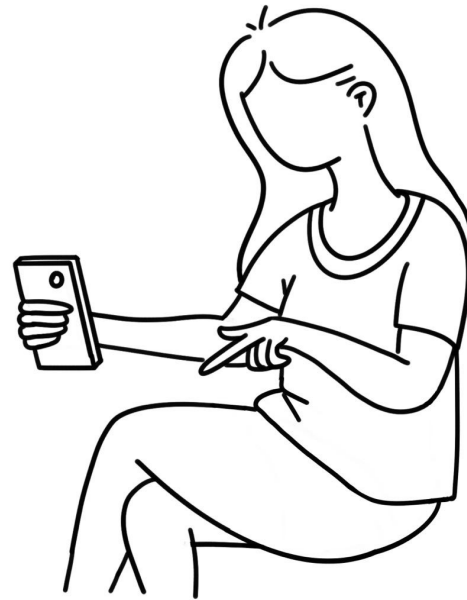



**Accusation**

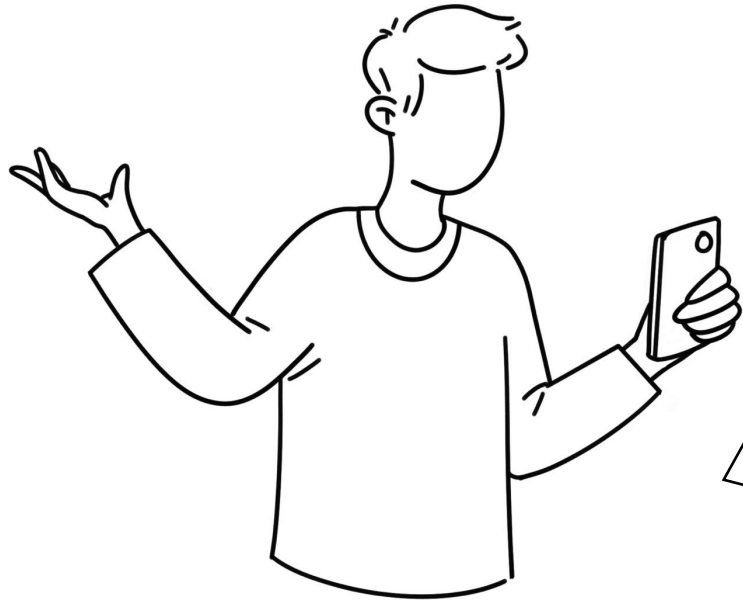

You are responsible for these tasks, and if you quit now, the whole project will be affected.





I' ve told you many times before, this place can not be written like this, why you still do nothing to change.





Think about it,  
do you want  
me to say what  
is wrong with  
you?



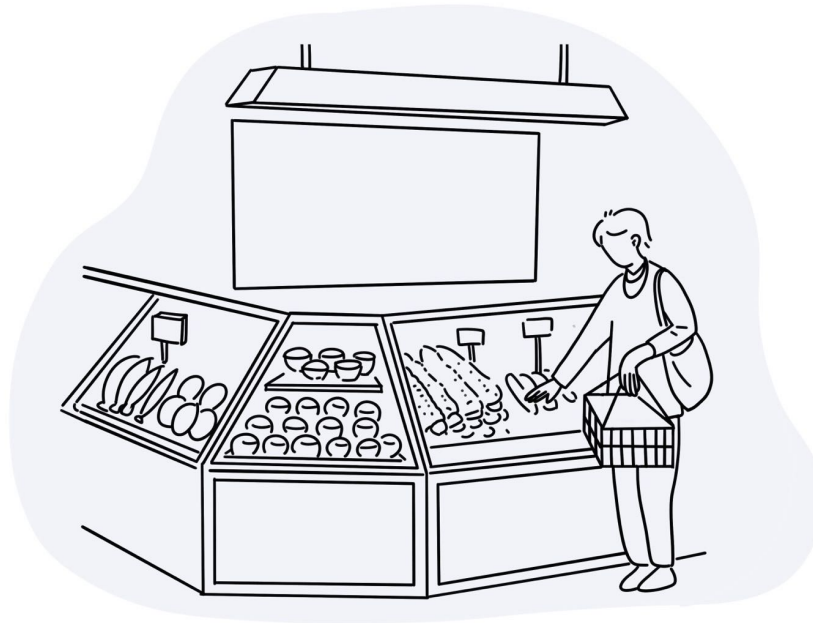

Obviously it was the shopkeeper's fault, they sold me expired food. Why did you persuade me not to blame them?





If I have no shame like you and do these things, I can also be the team leader.





It's obviously your fault, why you did not respond to my message and escape your mistake.





You feel that I  
am nagging,  
but you keep  
making the  
same mistakes.

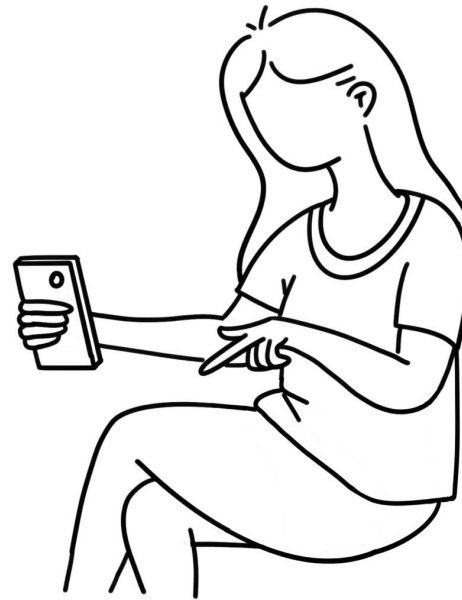

Supplement: 3613905.3650781-supplement-1.pdf [file 3613905.3650781-supplement-1.pdf]
